# Supplementary material
Source: PubMed Central journal article supplement (PMC5750578)
Supplement: pathogens-06-00054-s001.pdf [file pathogens-06-00054-s001.pdf]

Table S1. Oligonucleotide taqMan qPCR primer sequences used to screen pathogens and human-fecal indicator *Bacteroidetes* and PCR primer sequences for clone sequencing

| Target                                  | Oligo name    | Sequences (5'-3')                               | Tm (°C) | Detection limit (CE per reaction) | Reference                          |
|-----------------------------------------|---------------|-------------------------------------------------|---------|-----------------------------------|------------------------------------|
| <i>Legionella</i> spp. (qPCR)           | Leg F1c       | TAGTGG AATTTCCGGTGTA                            | 50      | 2                                 | This study                         |
|                                         | Leg R1c       | CCAACAGCTAGTTGACATC                             |         |                                   |                                    |
|                                         | Leg-probe     | 6Fam-CGGCTACCTGGCCTAATACTGA-Tamra               |         |                                   |                                    |
| <i>L. pneumophila</i> (qPCR)            | mipF1a        | AGGATAAGTTGTCTTATAGCA                           | 60      | 2                                 | This study                         |
|                                         | mipR1         | TTAAGAACGTCTTTCA TTTG                           |         |                                   |                                    |
|                                         | mipProbe      | 6FAM-TAATCCGGAAGCAATGGCTAA-Tamra                |         |                                   |                                    |
| <i>L. pneumophila</i> (CYBR-Green qPCR) | rtxAf         | ATTGCGCCTGGCAAAC TTTAGGTG                       | 64      | 2                                 | Lu, et al. 2013                    |
|                                         | rtxAr         | GGCGCAAATCGTTTCCACCTTGTA                        |         |                                   |                                    |
| <i>L. pneumophila</i> (CYBR-Green qPCR) | sidFf         | ATTGTTTCGCGAGGGTATGAAAGC G                      | 64      | 2                                 | Lu, et al. 2013                    |
|                                         | sidFr         | TCTTTCCAAGACAGACTCTCGCGT                        |         |                                   |                                    |
| <i>Mycobacterium</i> spp. (qPCR)        | 23Smyco F     | GGG GTGTGGTGT TTTGAG                            | 62      | 1                                 | Bruijnesteijn van Coppenraet, 2004 |
|                                         | 23Smyco R     | CTCCCACGTCCTTCATC                               |         |                                   |                                    |
|                                         | 23Smyco Probe | 6-carboxyfluorescein-TGGATAGTGGTTGCGAGCATC-BHQ1 |         |                                   |                                    |
| <i>Acanthamoeba</i> spp. (qPCR)         | TaqAcF1       | CGACCAGCGATTAGGAGACG                            | 60      | 2                                 | Riviere et al. 2006                |
|                                         | TaqAcR1       | CCGACGCCAAGGACGAC                               |         |                                   |                                    |
|                                         | TaqAcP1       | FAM-TGAATACAAAACACCACCATCGGC GC-TAMRA           |         |                                   |                                    |
| <i>Vermamoeba vermiformis</i> (qPCR)    | Hv1227F       | TTA CGA GGT CAG GAC ACT GT                      | 56      | 2                                 | Kuiper et al. 2006                 |
|                                         | Hv1728R       | GAC CAT CCG GAG TTC TCG                         |         |                                   |                                    |

Table S2. Element compositions of storage tank sediments

| Common Element | Occurrence | Average | Standard Deviation | Minimum Result | Median Result | Maximum Result |
|----------------|------------|---------|--------------------|----------------|---------------|----------------|
| Al (wt%)       | 87.5%      | 3.35    | 3.26               | 0.01           | 2.00          | 10.43          |
| Ca (wt%)       | 87.5%      | 3.17    | 2.39               | 0.59           | 2.05          | 6.50           |
| Cl (wt%)       | 25%        | 0.96    | 0.04               | 0.93           | 0.96          | 0.98           |
| Fe (wt%)       | 100%       | 15.96   | 15.52              | 1.36           | 13.31         | 49.98          |
| K (wt%)        | 25%        | 0.77    | 0.16               | 0.65           | 0.77          | 0.88           |
| Mg (wt%)       | 37.5%      | 0.61    | 0.08               | 0.54           | 0.65          | 0.65           |
| Mn (wt%)       | 37.5%      | 3.63    | 1.84               | 1.62           | 4.04          | 5.22           |
| Na (wt%)       | 62.5%      | 2.13    | 1.30               | 0.96           | 1.65          | 4.05           |
| O (wt%)        | 100%       | 24.09   | 4.83               | 17.72          | 23.89         | 33.39          |
| Si (wt%)       | 100%       | 7.07    | 5.94               | 2.13           | 5.21          | 20.60          |
| Zn (wt%)       | 75%        | 18.71   | 14.91              | 3.01           | 17.53         | 41.54          |

Table S3. Element components in sediments of different locations

| Sample | Coefficient of Uniformity | Coefficient of Curvature | Bulk Density | Particle Density | Porosity | Al (wt%) | Ca (wt%) | Cl (wt%) | Fe (wt%) | K (wt%) | Mg (wt%) | Mn (wt%) | Na (wt%) | O (wt%) | Si (wt%) | Zn (wt%) |
|--------|---------------------------|--------------------------|--------------|------------------|----------|----------|----------|----------|----------|---------|----------|----------|----------|---------|----------|----------|
| D39    | 3.35                      | 0.64                     | 0.54         | 2.68             | 0.80     | 2.26     | 2.05     |          | 19.93    |         |          |          |          | 23.47   | 5.42     | 19.35    |
| D40    | 4.33                      | 0.57                     | 0.51         | 3.58             | 0.86     | 2.31     | 4.33     |          | 19.54    |         | 0.65     |          |          | 22.86   | 5        | 15.71    |
| D41    | 5.75                      | 0.46                     | 0.75         | 2.26             | 0.67     | 1.17     | 5.93     |          | 1.36     |         |          |          |          | 17.72   | 2.13     | 41.54    |
| D42    | 4.37                      | 0.61                     | 0.70         | 1.39             | 0.50     | 1.74     | 6.5      |          | 3.72     |         | 0.65     |          | 1.65     | 18.92   | 3.93     | 29.03    |
| D43    | 2.53                      | 0.81                     |              |                  |          | 4.12     | 1.42     | 0.98     | 17.53    | 0.65    | 0.52     | 4.04     | 2.84     | 24.30   | 7.94     | 0.41     |
| D50    | 5.56                      | 1.33                     | 1.02         | 1.22             | 0.17     |          | 0.59     |          | 49.98    |         |          |          | 1.13     | 26.44   | 2.71     | 3.62     |
| D53    | 9.39                      | 0.46                     | 0.45         | 1.17             | 0.62     | 1.45     | 1.4      | 0.93     | 6.56     |         |          | 5.22     | 4.05     | 33.39   | 20.6     | 3.01     |
| D54    | 2.93                      | 0.74                     | 0.83         | 1.24             | 0.33     | 10.43    |          |          | 9.08     | 0.88    |          | 1.62     | 5.96     | 25.58   | 8.86     | 0.03     |

Table S4. major bacterial compositions with the relative abundance of OTUs > 1% in any samples at 97% similarity level)

| Sample Name  | 1 <sup>st</sup> abundant          | Percentage | 2 <sup>nd</sup> abundant       | Percentage | Correlation (R <sup>2</sup> ) |
|--------------|-----------------------------------|------------|--------------------------------|------------|-------------------------------|
| D39 Water    | Unclassified Comamonadaceae       | 73.7       | Unclassified Sphingomonadaceae | 6.3        | 0.69                          |
| D39 Sediment | Unclassified Sphingomonadaceae    | 23.1       | Unclassified Comamonadaceae    | 20.8       |                               |
| D40 Water    | Unclassified Comamonadaceae       | 23.7       | Reyranela massiliensis         | 6.4        | 0.47                          |
| D40 Sediment | Unclassified Syntrophobacteraceae | 12.2       | Unclassified Solibacterales    | 7.7        |                               |
| D41 Water    | Pseudomonas veronii               | 34.2       | Unclassified Comamonadaceae    | 16.0       | 0.88                          |
| D41 Sediment | Pseudomonas veronii               | 49.4       | Unclassified Massilia          | 17.4       |                               |
| D42 Water    | Pseudomonas veronii               | 46.5       | Unclassified Massilia          | 14.9       | 0.98                          |
| D42 Sediment | Pseudomonas veronii               | 37.7       | Unclassified Massilia          | 7.7        |                               |
| D43 Water    | Unclassified Pseudomonas          | 21.5       | Unclassified MLE1-12           | 10.1       | n/a                           |
| D43 Sediment | n/a                               |            |                                |            |                               |
| D50 Water    | Unclassified Novosphingobium      | 26.1       | Unclassified Comamonadaceae    | 6.4        | 0.38                          |
| D50 Sediment | Unclassified Geothrix             | 18.0       | Unclassified Sulfuritalea      | 17.4       |                               |
| D51 Water    | Unclassified Acinetobacter        | 49.6       | Unclassified Pseudomonadaceae  | 7.0        |                               |
| D51 Sediment | Sphingomonas wittichii            | 38.0       | Unclassified Comamonadaceae    | 18.3       |                               |
| D53 Water    | Blastomonas natatoria             | 26.5       | Unclassified Acinetobacter     | 11.9       | 0.11                          |
| D53 Sediment | unclassified PK29                 | 9.2        | unclassified s-70              | 8.6        |                               |
| D54 Water    | Unclassified Pseudomonas          | 48.9       | Unclassified Comamonadaceae    | 6.8        | 0.07                          |
| D54 Sediment | Unclassified Nitrospira           | 15.7       | Unclassified Gemm-1            | 13.1       |                               |
| D55 Water    | Nevskia ramosa                    | 93.4       | Unclassified Sphingomonadaceae | 2.0        |                               |
| D55 Sediment | Unclassified Sphingomonadaceae    | 42.1       | Unclassified Comamonadaceae    | 24.2       |                               |
| D56 Water    | Unclassified Enterobacteriaceae   | 17.2       | Unclassified Pseudomonas       | 6.3        |                               |
| D56 Sediment | Sphingomonas asaccharolytica      | 15.8       | Dongia mobilis                 | 8.1        |                               |
| D60 Sediment | Unclassified Novosphingobium      | 33.0       | Peredibacter starrii           | 19.9       |                               |
